# Supplementary material for: The causal associations between growth factors and constipation: a two-sample Mendelian randomization study
Source: Front Physiol. 2023 Jul 12;14:1204146. doi: 10.3389/fphys.2023.1204146 (PMC10369006; doi:10.3389/fphys.2023.1204146)
Supplement: Supplementary file 1 [file Table2.xlsx]

## Sheet: Sheet1
Supplementary Table 2 The F-value of SNPS in MR analyses.
Exposure	SNP	Effect allele	Other allele	Exposure			R2	F-value
				Beta	SE	P-value
Proheparin-binding EGF-like growth factor levels(ebi-a-GCST90010133)	rs12408051	A	G	-0.430402	0.0905166	2.64186e-06	0.0162587	21.4525
Proheparin-binding EGF-like growth factor levels(ebi-a-GCST90010134)	rs148019602	T	C	1.04502	0.216124	1.82663e-06	0.0173333	22.8955
Proheparin-binding EGF-like growth factor levels(ebi-a-GCST90010135)	rs6781011	T	A	0.271355	0.0565888	2.516e-06	0.0186733	24.6992
Proheparin-binding EGF-like growth factor levels(ebi-a-GCST90010136)	rs62304717	T	C	-0.516281	0.108927	2.844e-06	0.0180052	23.7992
Proheparin-binding EGF-like growth factor levels(ebi-a-GCST90010137)	rs117245161	A	G	-0.450372	0.0966321	4.33112e-06	0.0170641	22.5337
Proheparin-binding EGF-like growth factor levels(ebi-a-GCST90010138)	rs10816284	A	G	-0.199413	0.0403265	1.10372e-06	0.0192386	25.4615
Proheparin-binding EGF-like growth factor levels(ebi-a-GCST90010139)	rs13298221	A	C	0.626824	0.127452	1.43506e-06	0.0191543	25.3478
Proheparin-binding EGF-like growth factor levels(ebi-a-GCST90010140)	rs117156866	C	T	0.424977	0.0897239	2.92153e-06	0.0165059	21.7842
Proheparin-binding EGF-like growth factor levels(ebi-a-GCST90010141)	rs7916868	T	A	0.240775	0.0402571	5.41215e-09	0.0289844	38.7448
Proheparin-binding EGF-like growth factor levels(ebi-a-GCST90010142)	rs2707106	G	A	0.206255	0.0437653	3.49494e-06	0.0169249	22.3467
Proheparin-binding EGF-like growth factor levels(ebi-a-GCST90010143)	rs5997679	C	T	-0.466565	0.0993219	4.5923e-06	0.0187098	24.7484
Proheparin-binding EGF-like growth factor levels(ebi-a-GCST90012067)	rs78909033	A	G	-0.08	0.0172	3.17797e-06	0.00141724	30.8772
Proheparin-binding EGF-like growth factor levels(ebi-a-GCST90012068)	rs7601187	C	G	-0.1772	0.0367	1.34301e-06	0.00139319	30.3526
Proheparin-binding EGF-like growth factor levels(ebi-a-GCST90012069)	rs1354034	C	T	-0.0785	0.0108	2.79769e-13	0.00293684	64.0821
Proheparin-binding EGF-like growth factor levels(ebi-a-GCST90012070)	rs1039387	T	C	-0.0587	0.0126	3.24601e-06	0.00139564	30.406
Proheparin-binding EGF-like growth factor levels(ebi-a-GCST90012071)	rs2517622	C	G	0.0993	0.017	5.07797e-09	0.00189056	41.2089
Proheparin-binding EGF-like growth factor levels(ebi-a-GCST90012072)	rs78869537	G	A	0.3005	0.0553	5.54396e-08	0.0102653	225.648
Proheparin-binding EGF-like growth factor levels(ebi-a-GCST90012073)	rs6456509	T	G	0.0569	0.0111	3.17702e-07	0.00147272	32.0878
Proheparin-binding EGF-like growth factor levels(ebi-a-GCST90012074)	rs181695972	T	C	0.2123	0.0435	1.04501e-06	0.00220579	48.0952
Proheparin-binding EGF-like growth factor levels(ebi-a-GCST90012075)	rs10820606	C	A	-0.0884	0.0144	7.73909e-10	0.00290054	63.2877
Proheparin-binding EGF-like growth factor levels(ebi-a-GCST90012076)	rs7021157	G	A	0.1508	0.0307	9.34007e-07	0.00160369	34.9459
Proheparin-binding EGF-like growth factor levels(ebi-a-GCST90012077)	rs10761741	T	G	0.1379	0.0104	2.231e-40	0.00922495	202.567
Proheparin-binding EGF-like growth factor levels(ebi-a-GCST90012078)	rs887342	G	T	-0.107	0.0234	4.71802e-06	0.00287444	62.7165
Proheparin-binding EGF-like growth factor levels(ebi-a-GCST90012079)	rs12416973	G	A	-0.0654	0.0138	2.22602e-06	0.00135062	29.4239
Proheparin-binding EGF-like growth factor levels(ebi-a-GCST90012080)	rs11041357	T	C	0.0889	0.0179	6.89398e-07	0.00158429	34.5226
Proheparin-binding EGF-like growth factor levels(ebi-a-GCST90012081)	rs1716505	G	C	0.0682	0.0128	1.01501e-07	0.00203747	44.4176
Proheparin-binding EGF-like growth factor levels(ebi-a-GCST90012082)	rs11553699	G	A	0.1373	0.0182	4.38026e-14	0.00397853	86.9026
Proheparin-binding EGF-like growth factor levels(ebi-a-GCST90012083)	rs12910104	T	A	0.0869	0.0175	7.39895e-07	0.00292317	63.783
Proheparin-binding EGF-like growth factor levels(ebi-a-GCST90012084)	rs117739101	C	A	0.1861	0.038	9.94695e-07	0.00182625	39.8046
Proheparin-binding EGF-like growth factor levels(ebi-a-GCST90012085)	rs145616974	C	T	0.2226	0.0485	4.42904e-06	0.00197092	42.9641
Proheparin-binding EGF-like growth factor levels(ebi-a-GCST90012086)	rs3743953	G	A	-0.0792	0.0159	6.71305e-07	0.00149415	32.5554
Proheparin-binding EGF-like growth factor levels(ebi-a-GCST90012087)	rs8263	T	C	0.051	0.0106	1.639e-06	0.00129939	28.3063
Proheparin-binding EGF-like growth factor levels(ebi-a-GCST90012088)	rs143362241	G	A	0.0643	0.0115	2.47902e-08	0.00204445	44.5703
Proheparin-binding EGF-like growth factor levels(ebi-a-GCST90012089)	rs12326210	C	T	-0.1659	0.0346	1.639e-06	0.0015863	34.5664
Proheparin-binding EGF-like growth factor levels(ebi-a-GCST90012090)	rs41479645	G	C	0.0574	0.0125	4.37502e-06	0.00133422	29.0661
Proheparin-binding EGF-like growth factor levels(ebi-a-GCST90012091)	rs892090	G	T	0.0829	0.016	2.25398e-07	0.00177165	38.6125
Proheparin-binding EGF-like growth factor levels(ebi-a-GCST90012092)	rs807758	C	T	-0.0587	0.0118	6.55496e-07	0.00168081	36.6293
NGFI-A-binding protein 2	rs11208746	A	G	0.1297	0.0258	4.7863e-07	0.00840075	27.9489
NGFI-A-binding protein 3	rs1355846	G	A	-0.1173	0.0251	2.95121e-06	0.00687834	22.8488
NGFI-A-binding protein 4	rs842253	C	T	-0.1313	0.0253	2.04174e-07	0.00834038	27.7463
NGFI-A-binding protein 5	rs17497241	A	G	-0.1714	0.0375	4.7863e-06	0.00732343	24.3382
NGFI-A-binding protein 6	rs191948691	C	A	0.4495	0.0962	3.01995e-06	0.00816461	27.1568
NGFI-A-binding protein 7	rs6926380	T	C	-0.134	0.029	3.89045e-06	0.00665252	22.0936
NGFI-A-binding protein 8	rs73484048	G	A	-0.1269	0.0263	1.41254e-06	0.00726177	24.1318
NGFI-A-binding protein 9	rs762125	G	A	-0.1667	0.033	4.46684e-07	0.00761284	25.3074
NGFI-A-binding protein 10	rs139129657	G	A	0.4847	0.0965	5.12861e-07	0.0103925	34.6449
NGFI-A-binding protein 11	rs139616278	T	C	-0.178	0.0342	1.99526e-07	0.00904995	30.1284
NGFI-A-binding protein 12	rs11214078	T	C	-0.1921	0.0419	4.67735e-06	0.00691189	22.961
NGFI-A-binding protein 13	rs71469652	C	T	0.2471	0.0521	2.13796e-06	0.00784677	26.0912
NGFI-A-binding protein 14	rs113249024	C	T	-0.1435	0.0293	9.54993e-07	0.00740132	24.599
NGFI-A-binding protein 15	rs12819357	C	T	-0.157	0.0337	3.16228e-06	0.00663939	22.0497
NGFI-A-binding protein 16	rs79586714	A	C	0.3173	0.0691	4.46684e-06	0.00763208	25.3719
NGFI-A-binding protein 17	rs146512127	A	G	0.592	0.1284	4.0738e-06	0.00730305	24.27
NGFI-A-binding protein 18	rs61972817	G	A	-0.14	0.0289	1.28825e-06	0.00714559	23.743
NGFI-A-binding protein 19	rs12442553	T	C	-0.3252	0.0704	3.89045e-06	0.00657549	21.8361
NGFI-A-binding protein 20	rs11081859	A	G	0.1786	0.0384	3.38844e-06	0.00670094	22.2555
NGFI-A-binding protein 21	rs117588167	T	C	0.1573	0.0311	4.2658e-07	0.00792082	26.3394
VEGF Sr2	rs735379	G	A	-0.3498	0.0738286	2.48e-06	NA	22.4487
VEGF Sr3	rs34231037	G	A	-1.165	0.120901	4.55e-21	NA	92.8522
VEGF Sr4	rs2305948	T	C	0.3463	0.0675049	3.48e-07	NA	26.3169
VEGF Sr5	rs651007	T	C	-0.367	0.049655	3.09e-13	NA	54.6268
VEGF Sr6	rs11010274	G	T	-0.2716	0.0589026	4.54e-06	NA	21.2613
VEGF Sr7	rs2833924	T	C	-0.5172	0.10717	1.61e-06	NA	23.2901
VEGF Sr8	rs12628704	A	G	-0.2641	0.0563473	3.15e-06	NA	21.968
FGF7	rs3014629	T	C	-0.2435	0.0508351	1.92e-06	NA	22.9441
FGF8	rs2811492	G	A	0.2073	0.044909	4.42e-06	NA	21.3075
FGF9	rs17204676	C	T	-0.2537	0.0545357	3.73e-06	NA	21.6411
PDGF-AA	rs6766558	A	G	0.2162	0.0445314	1.4e-06	NA	23.571
PDGF-AA	rs9592030	A	G	-0.2687	0.0567836	2.54e-06	NA	22.3918
PDGF-AA	rs12889553	G	A	0.3806	0.0753365	5.2e-07	NA	25.5227
VEGF121	rs12122763	T	C	0.3593	0.0737631	1.29e-06	NA	23.7266
VEGF122	rs11724772	C	T	-0.3439	0.0741483	3.99e-06	NA	21.5111
VEGF123	rs7764227	T	G	-0.3074	0.0483714	3.16e-10	NA	40.386
VEGF124	rs9560761	C	G	0.2218	0.047843	4.03e-06	NA	21.4925
TGF-β R II	rs13023321	G	A	-0.2041	0.0443985	4.85e-06	NA	21.1324
TGF-β R II	rs9849231	G	A	-0.2699	0.0575971	3.17e-06	NA	21.9586
TGF-β R II	rs7750167	A	C	-0.2806	0.0592733	2.52e-06	NA	22.4108
TGF-β R II	rs7815297	A	G	-0.4172	0.0908735	4.99e-06	NA	21.0773
Note: Beta: Estimate coefficient; P-value: P-value from GWAS; SE: standard error of coefficient estimate; R2: the variance of exposure explained by each IV; NA: not applicable.
