# Supplementary material for: The causal associations between growth factors and constipation: a two-sample Mendelian randomization study
Source: Front Physiol. 2023 Jul 12;14:1204146. doi: 10.3389/fphys.2023.1204146 (PMC10369006; doi:10.3389/fphys.2023.1204146)
Supplement: Supplementary file 2 [file Table1.xlsx]

## Sheet: Sheet1
Supplementary Table 1. Detailed information of instrumental variables used in MR analyses.
Exposure	Exposure ID	Outcome	SNP	Effect allele	Other allele	Exposure			Outcome
						Beta	SE	P-value	Beta	SE	P-value
Proheparin-binding EGF-like growth factor levels	ebi-a-GCST90010133	Constipation(MRC-IEU)	rs10816284	A	G	-0.199413	0.0403265	1.10372e-06	0.000219504	0.000177328	0.22
Proheparin-binding EGF-like growth factor levels	ebi-a-GCST90010133	Constipation(MRC-IEU)	rs12408051	A	G	-0.430402	0.0905166	2.64186e-06	0.00070745	0.000270616	0.0089
Proheparin-binding EGF-like growth factor levels	ebi-a-GCST90010133	Constipation(MRC-IEU)	rs2707106	G	A	0.206255	0.0437653	3.49494e-06	-0.00014374	0.00019821	0.47
Proheparin-binding EGF-like growth factor levels	ebi-a-GCST90010133	Constipation(MRC-IEU)	rs6781011	T	A	0.271355	0.0565888	2.516e-06	8.90874e-05	0.000223997	0.69
Proheparin-binding EGF-like growth factor levels	ebi-a-GCST90010133	Constipation(MRC-IEU)	rs7916868	T	A	0.240775	0.0402571	5.41215e-09	0.000200234	0.000175737	0.25
Proheparin-binding EGF-like growth factor levels	ebi-a-GCST90012067	Secondary Constipation (MRC-IEU)	rs1039387	T	C	-0.0587	0.0126	3.24601e-06	0.000240747	0.000209935	0.25
Proheparin-binding EGF-like growth factor levels	ebi-a-GCST90012067	Secondary Constipation (MRC-IEU)	rs10761741	T	G	0.1379	0.0104	2.231e-40	-0.000428866	0.000191866	0.025
Proheparin-binding EGF-like growth factor levels	ebi-a-GCST90012067	Secondary Constipation (MRC-IEU)	rs11041357	T	C	0.0889	0.0179	6.89398e-07	-0.000199029	0.000316779	0.53
Proheparin-binding EGF-like growth factor levels	ebi-a-GCST90012067	Secondary Constipation (MRC-IEU)	rs11553699	G	A	0.1373	0.0182	4.38026e-14	0.000237028	0.000288137	0.41
Proheparin-binding EGF-like growth factor levels	ebi-a-GCST90012067	Secondary Constipation (MRC-IEU)	rs12416973	G	A	-0.0654	0.0138	2.22602e-06	-0.000251696	0.000241325	0.3
Proheparin-binding EGF-like growth factor levels	ebi-a-GCST90012067	Secondary Constipation (MRC-IEU)	rs12910104	T	A	0.0869	0.0175	7.39895e-07	-0.000270611	0.000208518	0.19
Proheparin-binding EGF-like growth factor levels	ebi-a-GCST90012067	Secondary Constipation (MRC-IEU)	rs1354034	C	T	-0.0785	0.0108	2.79769e-13	0.000131106	0.000192673	0.5
Proheparin-binding EGF-like growth factor levels	ebi-a-GCST90012067	Secondary Constipation (MRC-IEU)	rs143362241	G	A	0.0643	0.0115	2.47902e-08	0.000186558	0.000189317	0.32
Proheparin-binding EGF-like growth factor levels	ebi-a-GCST90012067	Secondary Constipation (MRC-IEU)	rs1716505	G	C	0.0682	0.0128	1.01501e-07	-8.1816e-05	0.000205943	0.69
Proheparin-binding EGF-like growth factor levels	ebi-a-GCST90012067	Secondary Constipation (MRC-IEU)	rs2517622	C	G	0.0993	0.017	5.07797e-09	-0.000209861	0.000277804	0.450001
Proheparin-binding EGF-like growth factor levels	ebi-a-GCST90012067	Secondary Constipation (MRC-IEU)	rs3743953	G	A	-0.0792	0.0159	6.71305e-07	0.000158385	0.000298534	0.6
Proheparin-binding EGF-like growth factor levels	ebi-a-GCST90012067	Secondary Constipation (MRC-IEU)	rs41479645	G	C	0.0574	0.0125	4.37502e-06	-0.000118965	0.000214069	0.58
Proheparin-binding EGF-like growth factor levels	ebi-a-GCST90012067	Secondary Constipation (MRC-IEU)	rs6456509	T	G	0.0569	0.0111	3.17702e-07	0.000235086	0.000200009	0.24
Proheparin-binding EGF-like growth factor levels	ebi-a-GCST90012067	Secondary Constipation (MRC-IEU)	rs78909033	A	G	-0.08	0.0172	3.17797e-06	0.000641462	0.000277901	0.021
Proheparin-binding EGF-like growth factor levels	ebi-a-GCST90012067	Secondary Constipation (MRC-IEU)	rs807758	C	T	-0.0587	0.0118	6.55496e-07	0.000444289	0.000192374	0.021
Proheparin-binding EGF-like growth factor levels	ebi-a-GCST90012067	Secondary Constipation (MRC-IEU)	rs8263	T	C	0.051	0.0106	1.639e-06	-2.16035e-05	0.00018932	0.91
Proheparin-binding EGF-like growth factor levels	ebi-a-GCST90012067	Secondary Constipation (MRC-IEU)	rs887342	G	T	-0.107	0.0234	4.71802e-06	-0.000215851	0.000255491	0.4
Proheparin-binding EGF-like growth factor levels	ebi-a-GCST90012067	Secondary Constipation (MRC-IEU)	rs892090	G	T	0.0829	0.016	2.25398e-07	-9.74596e-05	0.000254482	0.7
NGFI-A-binding protein 2	prot-a-1993	Constipation (FinnGen)	rs11081859	A	G	0.1786	0.0384	3.38844e-06	0.00791831	0.0128497	0.537746
NGFI-A-binding protein 2	prot-a-1993	Constipation (FinnGen)	rs11208746	A	G	0.1297	0.0258	4.7863e-07	0.0102388	0.00928453	0.270122
NGFI-A-binding protein 2	prot-a-1993	Constipation (FinnGen)	rs11214078	T	C	-0.1921	0.0419	4.67735e-06	0.0226006	0.0150387	0.132883
NGFI-A-binding protein 2	prot-a-1993	Constipation (FinnGen)	rs113249024	C	T	-0.1435	0.0293	9.54993e-07	-0.00316346	0.0110425	0.77451
NGFI-A-binding protein 2	prot-a-1993	Constipation (FinnGen)	rs12442553	T	C	-0.3252	0.0704	3.89045e-06	0.065843	0.0457178	0.149809
NGFI-A-binding protein 2	prot-a-1993	Constipation (FinnGen)	rs12819357	C	T	-0.157	0.0337	3.16228e-06	0.0229435	0.0126574	0.069886
NGFI-A-binding protein 2	prot-a-1993	Constipation (FinnGen)	rs1355846	G	A	-0.1173	0.0251	2.95121e-06	-0.00499021	0.00933439	0.592923
NGFI-A-binding protein 2	prot-a-1993	Constipation (FinnGen)	rs139129657	G	A	0.4847	0.0965	5.12861e-07	-0.00299799	0.020354	0.882901
NGFI-A-binding protein 2	prot-a-1993	Constipation (FinnGen)	rs139616278	T	C	-0.178	0.0342	1.99526e-07	0.0222764	0.0117079	0.0570821
NGFI-A-binding protein 2	prot-a-1993	Constipation (FinnGen)	rs146512127	A	G	0.592	0.1284	4.0738e-06	-0.00295666	0.0319712	0.926318
NGFI-A-binding protein 2	prot-a-1993	Constipation (FinnGen)	rs17497241	A	G	-0.1714	0.0375	4.7863e-06	0.0384194	0.0144347	0.00777714
NGFI-A-binding protein 2	prot-a-1993	Constipation (FinnGen)	rs191948691	C	A	0.4495	0.0962	3.01995e-06	-0.029166	0.0340373	0.391509
NGFI-A-binding protein 2	prot-a-1993	Constipation (FinnGen)	rs61972817	G	A	-0.14	0.0289	1.28825e-06	-0.0101183	0.0125416	0.419797
NGFI-A-binding protein 2	prot-a-1993	Constipation (FinnGen)	rs6926380	T	C	-0.134	0.029	3.89045e-06	0.00430059	0.010645	0.686213
NGFI-A-binding protein 2	prot-a-1993	Constipation (FinnGen)	rs71469652	C	T	0.2471	0.0521	2.13796e-06	-0.0347234	0.0193188	0.0722737
NGFI-A-binding protein 2	prot-a-1993	Constipation (FinnGen)	rs73484048	G	A	-0.1269	0.0263	1.41254e-06	-0.000241063	0.00951737	0.979793
NGFI-A-binding protein 2	prot-a-1993	Constipation (FinnGen)	rs762125	G	A	-0.1667	0.033	4.46684e-07	0.0206609	0.0131972	0.117455
NGFI-A-binding protein 2	prot-a-1993	Constipation (FinnGen)	rs79586714	A	C	0.3173	0.0691	4.46684e-06	-0.000457041	0.0352455	0.989654
NGFI-A-binding protein 2	prot-a-1993	Constipation (FinnGen)	rs842253	C	T	-0.1313	0.0253	2.04174e-07	0.00410571	0.00948018	0.664955
VEGF sR2	prot-c-3651_50_5	Constipation (FinnGen)	rs11010274	G	T	-0.2716	0.0589026	4.54203e-06	-0.00338933	0.0138066	0.80608
VEGF sR2	prot-c-3651_50_5	Constipation (FinnGen)	rs12628704	A	G	-0.2641	0.0563473	3.15297e-06	0.00598963	0.0141479	0.672034
VEGF sR2	prot-c-3651_50_5	Constipation (FinnGen)	rs2305948	T	C	0.3463	0.0675049	3.48297e-07	-0.0234686	0.0163934	0.152261
VEGF sR2	prot-c-3651_50_5	Constipation (FinnGen)	rs2833924	T	C	-0.5172	0.10717	1.61202e-06	0.034044	0.0324067	0.293477
VEGF sR2	prot-c-3651_50_5	Constipation (FinnGen)	rs34231037	G	A	-1.165	0.120901	4.54988e-21	0.0694022	0.0247641	0.00507037
VEGF sR2	prot-c-3651_50_5	Constipation (FinnGen)	rs651007	T	C	-0.367	0.049655	3.08674e-13	-0.00368704	0.0110964	0.739682
VEGF sR2	prot-c-3651_50_5	Constipation (FinnGen)	rs735379	G	A	-0.3498	0.0738286	2.476e-06	-0.00248439	0.0158126	0.875155
FGF7	prot-c-4487_1_1	Constipation (FinnGen)	rs17204676	C	T	-0.2537	0.0545357	3.73302e-06	-0.0111786	0.0119835	0.350907
FGF7	prot-c-4487_1_1	Constipation (FinnGen)	rs2811492	G	A	0.2073	0.044909	4.41703e-06	0.0201817	0.00949112	0.0334719
FGF7	prot-c-4487_1_1	Constipation (FinnGen)	rs3014629	T	C	-0.2435	0.0508351	1.91898e-06	-0.00563518	0.0104213	0.58869
TGF-b R II	prot-c-5133_17_3	Constipation (FinnGen)	rs13023321	G	A	-0.2041	0.0443985	4.84697e-06	-0.0187311	0.0543989	0.00973729
TGF-b R II	prot-c-5133_17_3	Constipation (FinnGen)	rs7750167	A	C	-0.2806	0.0592733	2.52e-06	-0.000777798	0.943759	0.0110255
TGF-b R II	prot-c-5133_17_3	Constipation (FinnGen)	rs7815297	A	G	-0.4172	0.0908735	4.98804e-06	-0.0392214	0.0246428	0.0174554
TGF-b R II	prot-c-5133_17_3	Constipation (FinnGen)	rs9849231	G	A	-0.2699	0.0575971	3.17402e-06	-0.0176233	0.153695	0.0123533
PDGF-AA	prot-c-4499_21_1	Secondary Constipation(MRC-IEU)	rs12889553	G	A	0.3806	0.0753365	5.19505e-07	-0.000514556	0.00032293	0.11
PDGF-AA	prot-c-4499_21_1	Secondary Constipation(MRC-IEU)	rs6766558	A	G	0.2162	0.0445314	1.39801e-06	-0.000219465	0.00019605	0.26
PDGF-AA	prot-c-4499_21_1	Secondary Constipation(MRC-IEU)	rs9592030	A	G	-0.2687	0.0567836	2.54302e-06	0.000207226	0.000247092	0.4
VEGF121	prot-c-4867_15_2	Secondary Constipation(MRC-IEU)	rs11724772	C	T	-0.3439	0.0741483	3.98703e-06	0.000302338	0.000316379	0.34
VEGF121	prot-c-4867_15_2	Secondary Constipation(MRC-IEU)	rs12122763	T	C	0.3593	0.0737631	1.293e-06	-0.000583816	0.000317152	0.0659994
VEGF121	prot-c-4867_15_2	Secondary Constipation(MRC-IEU)	rs7764227	T	G	-0.3074	0.0483714	3.16497e-10	0.000368712	0.000212971	0.0830004
VEGF121	prot-c-4867_15_2	Secondary Constipation(MRC-IEU)	rs9560761	C	G	0.2218	0.047843	4.03497e-06	-0.000238992	0.000212189	0.26
Note: Beta: Estimate coefficient; P-value: P-value from GWAS; SE: standard error of coefficient estimate.
